1 **Immunogenicity and safety of an inactivated SARS-CoV-2 vaccine in**  
2 **people living with HIV-1**

3  
4 Yanmeng Feng<sup>1,§</sup>, Yifan Zhang<sup>2,3,4,§</sup>, Zhangyufan He<sup>2,4,§</sup>, Haojie Huang<sup>5</sup>, Xiangxiang  
5 Tian<sup>2,3,4</sup>, Gang Wang<sup>4</sup>, Daihong Chen<sup>4</sup>, Yanqin Ren<sup>2</sup>, Liqiu Jia<sup>2</sup>, Wanhai Wang<sup>3</sup>, Jing  
6 Wu<sup>2</sup>, Lingyun Shao<sup>2</sup>, Wenhong Zhang<sup>2,6,7,8</sup>, Heng Tang<sup>1,#</sup>, Yanmin Wan<sup>2,7,9,#</sup>

7  
8 <sup>1</sup> Hubei Provincial Center for Disease Control and Prevention, Wuhan 430065, China;

9 <sup>2</sup> Department of Infectious Disease of Huashan Hospital, National Medical Center for  
10 Infectious Diseases and Shanghai Key Laboratory of Infectious Diseases and Biosafety  
11 Emergency Response, Fudan University, Shanghai 200040, China;

12 <sup>3</sup> Clinical Laboratory, The First Affiliated Hospital of Zhengzhou University, Key  
13 Laboratory of Laboratory Medicine of Henan Province, Zhengzhou 450052, China;

14 <sup>4</sup> Department of laboratory medicine, Shanghai Public Health Clinical Center, Shanghai  
15 201508, China;

16 <sup>5</sup> Wuhan Pioneer Social Work Service Center, Wuhan 430071, China;

17 <sup>6</sup> Key Laboratory of Medical Molecular Virology (MOE/MOH) and Institutes of  
18 Biomedical Sciences, Shanghai Medical College, Fudan University, Shanghai 200032,  
19 China;

20 <sup>7</sup> State Key Laboratory of Genetic Engineering, School of Life Science, Fudan  
21 University, Shanghai 200438, China;

22 <sup>8</sup> National Clinical Research Centre for Aging & Medicine, Huashan Hospital, Fudan  
23 University, Shanghai 200040, China;

24 <sup>9</sup> Department of radiology, Shanghai Public Health Clinical Center, Shanghai 201508,  
25 China.

26 <sup>§</sup> These authors contribute equally to this work.

27 <sup>#</sup> Correspondence should be addressed to: Heng Tang, 867555881@qq.com; Yanmin  
28 Wan, yanmin\_wan@fudan.edu.cn

29  
30 **Running title:** Evaluating the BIBP-CorV vaccine in PLWH

31 **Word count:** Abstract, 299; main text, 2393

33 **Abstract**

34 **Background** It has been proven that inactivated COVID-19 vaccines are safe and  
35 effective in general population with intact immunity. However, their safety and  
36 immunogenicity have not been demonstrated in people living with HIV (PLWH).

37 **Methods** 42 HIV-1 infected individuals who were stable on cART and 28 healthy  
38 individuals were enrolled in this study. Two doses of an inactivated COVID-19 vaccine  
39 (BIBP-CorV) were given 4 weeks apart. The safety and reactogenicity of the vaccine  
40 were evaluated by observing clinical adverse events and solicited local and systemic  
41 reactions. Humoral responses were measured by anti-spike IgG ELISA and surrogate  
42 neutralization assays. Cell-mediated immune responses and vaccine induced T cell  
43 activation were measured by flow cytometry.

44 **Findings** All the HIV-1 infected participants had a CD4<sup>+</sup> T cell count of above 200  
45 cells/ $\mu$ L both at baseline and 4 weeks after vaccination. No solicited adverse reaction  
46 was observed among all participants. Similar binding antibody, neutralizing antibody  
47 and S protein specific T cell responses were elicited in PLWH and healthy individuals.  
48 Further analyses showed that PLWH with low baseline CD4<sup>+</sup>/CD8<sup>+</sup> T cell ratios (<0.6)  
49 generated lower antibody responses after vaccination than PLWH with medium (0.6~1.0)  
50 or high ( $\geq$ 1.0) baseline CD4<sup>+</sup>/CD8<sup>+</sup> T cell ratios ( $P < 0.01$ ). The CD3<sup>+</sup>, CD4<sup>+</sup> and CD8<sup>+</sup> T  
51 cell counts of PLWH decreased significantly after vaccination, but it did not lead to any  
52 adverse clinical manifestation. Moreover, we found that the general burden of HIV-1  
53 among the PLWH cohort decreased significantly ( $P = 0.0192$ ) after vaccination. And the  
54 alteration of HIV-1 viral load was not significantly associated with the vaccine induced  
55 CD4<sup>+</sup> T cell activation.

56 **Interpretation** Our data demonstrate that the inactivated COVID-19 vaccine is safe and  
57 immunogenic in PLWH who are stable on cART with unsuppressed CD4 counts.

58 **Funding** This work was funded by the National Natural Science Foundation of China  
59 (Grant No. 81971559, 82041010).

60

61 **Key words:** HIV-1, COVID-19, Inactivated SARS-CoV-2 vaccine, Immunogenicity,  
62 Safety

63

64 **Research in context**

65 **Evidence before this study**

66 The safety and efficacy of inactivated COVID-19 vaccines have been validated in  
67 general population with intact immunity. However, their safety and immunogenicity have  
68 not been demonstrated in people living with HIV (PLWH).

69

70 **Added value of this study**

71 Our study provides the first evidence to show humoral and cellular immune responses  
72 to an inactivated vaccine in PLWH who have been stable on cART with good CD4 cell  
73 counts. We found that participants with HIV-1 generated antibody and T cell responses  
74 comparable with those of healthy individuals after two-dose vaccination. The baseline  
75 CD4/CD8 ratios while not the absolute CD4<sup>+</sup> T cell counts were shown to be associated  
76 with the magnitudes of vaccine induced antibody responses. Moreover, we showed that  
77 the vaccine induced T cell activation did not increase the viral burden in PLWH on cART.  
78 On the contrary, the levels of plasma HIV-1 RNA decreased among a significant  
79 percentage of PLWH.

80

81 **Implications of all the available evidence**

82 Our data demonstrate that the inactivated COVID-19 vaccine is safe and immunogenic  
83 in PLWH who are stable on cART with unsuppressed CD4 counts and indicate that this  
84 vaccine might be protective and efficacious against COVID-19 for people with HIV.

85

86

87

88

89

90

91

92

93

94

95 **Introduction**

96 Even though the well-controlled HIV infection per se is not found as a risk factor of  
97 increased SARS-CoV-2 prevalence,<sup>1,2</sup> it is alerted that the compromised immunities and  
98 the high frequencies of comorbidities may render excessive challenges to this  
99 population.<sup>3,4</sup> A more recently released WHO report ([WHO reference number:  
100 WHO/2019-nCoV/Clinical/HIV/2021.1](#)) suggests that HIV infection appears to be a  
101 significant independent risk factor for both severe/critical COVID-19 presentation at  
102 hospital admission and in-hospital mortality. Vaccination against SARS-CoV-2 for  
103 PLWH has also been recommended by WHO and health authorities of many countries.  
104 However, as a clinical observation showed that SARS-CoV-2 natural infection induced  
105 lower protective antibody responses in people with HIV,<sup>5</sup> it is concerned that the  
106 immunogenicity of COVID-19 in PLWH might be weak. The anxiety escalated when the  
107 news released from the Novavax COVID-19 vaccine study suggested that HIV infection  
108 might dampen the vaccine effectiveness.<sup>6</sup>

109 Reassuringly, more recently published data showed that both the messenger RNA  
110 vaccine and the ChAdOx1 nCoV-19 vaccine could elicit protective antibody responses  
111 in PLWH comparable with those in healthy individuals.<sup>7-10</sup> In this study, we compared  
112 the antibody responses to two-dose inactivated SARS-CoV-2 vaccination between  
113 healthy vaccinees and HIV-1 infected individuals stable on cART. We demonstrated that  
114 the inactivated COVID-19 vaccine was immunogenic and safe in PLWH. Baseline  
115 CD4<sup>+</sup>/CD8<sup>+</sup> T cell ratios were found to be associated with both the RBD binding  
116 antibody and the neutralizing antibody responses in PLWH.

117

118 **Materials and methods**

119 **Study design and participants**

120 In this open-label two-arm non-randomized study, we enrolled a cohort of HIV-1 infected  
121 individuals (n=42) who were stable on cART and under routine follow-up at  
122 Hubei Provincial Center for Disease Control and Prevention, China and a cohort of  
123 healthy individuals (n=28). Written informed consent was obtained from all participants,  
124 and the study was approved by the Research Ethics Committee of Hubei CDC

125 (approval reference number: HBCDC-AF/SC-08/02.0). The demographical  
126 characteristics of the enrolled vaccinees were depicted in [Table 1](#).

127

### 128 **Peripheral lymphocyte count and plasma HIV-1 viral RNA detection**

129 The peripheral lymphocyte counts and plasma HIV-1 viral RNA detections for HIV-1  
130 infected individuals were performed using the BD Multitest™ CD3 FITC / CD8 PE /  
131 CD45 PerCP / CD4 APC reagent and the COBAS® AmpliPrep / COBAS® TaqMan® HIV-  
132 1 Test (v2.0) kit, respectively. All the detections were conducted following the  
133 manufacturers` instructions in the clinical laboratory of Shanghai Public Health Clinical  
134 Center.

135

### 136 **Titration of SARS-CoV-2 RBD binding antibody**

137 In-house enzyme-linked immunosorbent assays (ELISA) were developed to measure  
138 SARS-CoV-2 RBD specific binding antibodies. High-binding 96-well EIA plates (Cat#  
139 9018, Corning, USA) were coated with purified SARS-CoV-2 RBD protein (Cat# 40591-  
140 V08H, Sino Biological, China) at a final concentration of 1µg/ml in carbonate/bi-  
141 carbonate coating buffer (30mM NaHCO<sub>3</sub>, 10mM Na<sub>2</sub>CO<sub>3</sub>, pH 9.6). Subsequently, the  
142 plates were blocked with 1×PBS containing 5% skimmed milk for 1 hour at 37°C. Next,  
143 50µl of diluted human plasma was added to each well. After 1-hour incubation at 37°C,  
144 the plates were washed with 1×PBS containing 0.05% Tween20 for 5 times. Then, 50µl  
145 of an HRP labeled goat anti-human IgG antibody (Cat# ab6759, Abcam, UK) diluted in  
146 1×PBS containing 5% skimmed milk were added to each well and incubated for 1 hour  
147 at 37°C. After a second round of wash, 50µl of TMB substrate reagent (Cat# MG882,  
148 MESGEN, China) was added to each well. 15 minutes later, the color development was  
149 stopped by adding 50µl of 1M H<sub>2</sub>SO<sub>4</sub> to each well and the values of optical density at  
150 OD<sub>450nm</sub> and OD<sub>630nm</sub> were measured using 800 TS microplate reader (Cat# 800TS,  
151 Biotek, USA).

152

### 153 **Quantification of SARS-CoV-2 neutralizing antibodies**

154 The neutralizing antibodies against SARS-CoV-2 were detected using a commercialized  
155 surrogate neutralization test developed by Suzhou Xinbo Biotechnology Ltd. Company

156 (PerkinElmer, China). The rationale and method of this assay have been elaborated in  
157 previous studies.<sup>11,12</sup> Briefly, plasma samples were firstly incubated with acridinium  
158 ester labeled SARS-CoV-2 RBD for 15 min at room temperature. Then, magnetic beads  
159 coated with purified human ACE2 protein were added into the mixture and incubated for  
160 15 min. After washing, the acridinium ester labeled RBD bound with the magnetic beads  
161 were measured by a chemiluminescent reaction. The concentrations of SARS-CoV-2  
162 neutralizing antibody correlate negatively with the luminescence intensities, which can  
163 be quantified by establishing a standard curve.

164

### 165 **Flowcytometry assays**

166 To minimize measurement errors, freshly isolated PBMCs were preserved in liquid  
167 nitrogen until the last follow-up was completed. Upon recovery, the PBMCs were  
168 washed twice with R10 (RPMI1640 with 10% FBS). After counting, 1 million live (trypan  
169 blue negative) cells from each sample were added to 96-well round bottom plates and  
170 incubated with either R10 or R10 containing synthesized spike protein peptides  
171 (0.6µg/ml for each peptide) overnight. Then, the cells were washed and stained  
172 sequentially with live/dead dye(Zombie Aqua Fixable Viability Kit, cat#423101,  
173 BioLegend), surface marker antibodies (Anti-human-CD3-APC/cyanine 7, cat#300318,  
174 BioLegend; anti-human-CD4-BV605, cat#566148, BioLegend; anti-human-CD8-APC,  
175 cat#344722, BioLegend; anti-human-HLA-DR-BV421, cat#307636, BioLegend; anti-  
176 human-CD38-Percp-Cy5-5, cat#551400, BD Pharmingen) and an intracellular IFN-γ  
177 antibody (anti-human-IFN-γ-PE, cat#502509, BioLegend). Stained samples were  
178 analyzed using a BD Fortessa flow cytometer and data were analyzed with FlowJo  
179 software version 10 (TreeStar Inc., Ashland, OR, USA). The gating strategy is shown in  
180 [Supplementary figure 1](#). The evaluation of T cell activation was based on the data  
181 generated from wells incubated with R10.

182

### 183 **Statistical analysis**

184 All the statistical analyses were conducted using Graphpad Prism 9 (GraphPad  
185 Software, USA). Normality tests were performed before all downstream statistical  
186 analyses except the Chi square test. Comparisons between two groups were performed

187 by the method of *t*-test. Differences among multiple groups were compared by the  
188 method of one-way ANOVA. The contingency analysis was done using the method of  
189 Chi-square test.

190

### 191 **Role of the funding source**

192 The funding source was not involved in study design, data collection and analysis, data  
193 interpretation, the writing of the report, and the decision to submit the paper for  
194 publication.

195

## 196 **Results**

### 197 **Baseline characteristics of PLWH and HIV related events after vaccination**

198 In this study, 28 healthy individuals and 42 PLWH were inoculated with two doses of the  
199 inactivated vaccine (BIBP-CorV) produced by Beijing Institute of Biological Products on  
200 22 April 2021 and 25 May 2021, respectively. PLWH were slightly older than the control  
201 ( $42.74 \pm 10.17$  versus  $37.79 \pm 8.804$  years,  $p=0.0392$ ). The gender composition and the  
202 mean BMI were similar between PLWH and healthy individuals (Table 1). All the HIV-1  
203 infected individuals have been on cART since being diagnosed with HIV-1 and have a  
204 peripheral CD4<sup>+</sup> T cell count of >200 cells/ $\mu$ L. No solicited adverse reaction was  
205 observed among all participants. None of PLWH developed HIV-related clinical events  
206 during the study period from 22 April 2021 to 25 June 2021.

207 At the beginning of vaccination, 22 patients had an undetectable plasma viral load, 8  
208 patients had detectable viral loads below 20 copies/ml and 12 patients had detectable  
209 viral loads beyond 20 copies/ml (Table 2). Unexpectedly, we found that the general viral  
210 burden among PLWH decreased after vaccination: 34 patients had an undetectable  
211 plasma viral load, 4 patients had detectable viral loads below 20 copies/ml and 4  
212 patients had detectable viral loads beyond 20 copies/ml ( $P=0.0192$ ) (Table 2).  
213 Meanwhile, our data also showed that the peripheral T cell counts decreased  
214 significantly after vaccination, but the CD4<sup>+</sup>/CD8<sup>+</sup> T cell ratios remained stable (Table 2).

215

### 216 **The inactivated SARS-CoV-2 vaccine elicited comparable antibody and T cell** 217 **responses in PLWH with those in healthy individuals**

218 To evaluate the immunogenicity of the inactivated SARS-CoV-2 vaccine in our cohorts,  
219 peripheral blood samples were collected at baseline, 4 weeks after the first dose and 4  
220 weeks after the second dose, respectively. The results of RBD binding antibody assays  
221 showed that the inactivated vaccine induced similar levels of RBD binding antibodies in  
222 the two cohorts after both the first and the second dose (Fig.1A). We found that the  
223 average fold increase of RBD binding antibody was significantly lower in PLWH (Fig.1B),  
224 which was presumably due to the relatively high background antibody levels in this  
225 cohort (Fig.1A). Neutralizing antibody responses were elicited in most participants after  
226 two doses of vaccination (Fig. 1D and 1E) and the magnitudes were similar between  
227 PLWH and the healthy control (Fig. 1F). In addition, we also found that the mean levels  
228 of S2 binding antibodies were similar between PLWH and healthy individuals both at  
229 baseline and 4 weeks post second vaccination (Supplementary Figure 2).  
230 The results of flowcytometry assays showed that two-dose inactivated SARS-CoV-2  
231 vaccine induced significant T cell responses in both HC and PLWH (Fig.2). Similar  
232 magnitudes of S protein specific CD4<sup>+</sup> (Fig. 2A) and CD8<sup>+</sup> (Fig. 2B) T cell responses  
233 were observed in the two cohorts.

234

### 235 **Baseline CD4/CD8 ratios were associated with antibody responses after the** 236 **vaccination in the cohort of PLWH**

237 To understand whether the baseline immune status can influence the vaccine induced  
238 antibody responses in PLWH, we further analyzed the relationships between baseline T  
239 cell counts and post vaccination antibody responses. Our data showed that neither the  
240 CD4<sup>+</sup> T cell counts nor the CD8<sup>+</sup> T cell counts at baseline correlated with the vaccine  
241 induced antibody responses (Data not shown). While, the CD4<sup>+</sup>/CD8<sup>+</sup> T cell ratios at  
242 baseline were found to be associated with antibody responses after the second dose of  
243 vaccination (Fig.3). More specifically, the average RBD binding and neutralizing  
244 antibody responses of HIV-1 positive vaccinees with low baseline CD4<sup>+</sup>/CD8<sup>+</sup> T cell  
245 ratios (<0.6) were significantly lower than those with medium (0.6-1.0) or high (≥1.0)  
246 baseline CD4<sup>+</sup>/CD8<sup>+</sup> T cell ratios (Fig.3A and 3B). Slightly different from the RBD  
247 binding antibody and the nAb responses, we observed that S2 binding antibody  
248 responses in HIV-1 positive vaccinees with medium baseline CD4<sup>+</sup>/CD8<sup>+</sup> T cell ratios



249 were significantly higher than those with both low and high baseline CD4<sup>+</sup>/CD8<sup>+</sup> T cell  
250 ratios (Fig.3C). We also analyzed the impacts of baseline CD4<sup>+</sup>/CD8<sup>+</sup> T cell ratios on T  
251 cell responses and found that there was no significant difference among PLWH with low,  
252 medium and high baseline CD4<sup>+</sup>/CD8<sup>+</sup> T cell ratios (Supplementary figure 3).

253

## 254 **The patterns of vaccine induced T cell activation were different between HC and** 255 **PLWH**

256 Vaccine induced activation of T cells was considered as a major constraint that might  
257 compromise vaccine conferred benefits in PLWH.<sup>13-15</sup> To investigate whether the  
258 vaccine induced T cell activation was associated with the observed fluctuation of HIV-1  
259 viral load, we measured the expressions of CD38 and HLA-DR on CD4<sup>+</sup> and CD8<sup>+</sup> T  
260 cells by flowcytometry. We observed that the patterns of vaccine induced T cell  
261 activation were different between HC and PLWH (Fig.4). Of note, our data showed that  
262 the percentages of CD38<sup>+</sup>HLA-DR<sup>-</sup> CD4<sup>+</sup> T cells (Fig.4B) increased, while the  
263 percentages of CD38<sup>-</sup>HLA-DR<sup>+</sup> CD8<sup>+</sup> T cells (Fig.4D) decreased in PLWH after  
264 vaccination. The decrease of CD38<sup>-</sup>HLA-DR<sup>+</sup>CD8<sup>+</sup> T cells has been reported by a  
265 previous study,<sup>13</sup> however, the underlying mechanism is not clear. We further analyzed  
266 the association between the observed T cell activation and plasma viral load fluctuation.  
267 Although no statistical significance was reached, our results showed that the vaccine  
268 induced fold-changes of CD38<sup>+</sup>HLA-DR<sup>-</sup>, CD38<sup>-</sup>HLA-DR<sup>+</sup> and CD38<sup>+</sup>HLA-DR<sup>+</sup>CD4<sup>+</sup> T  
269 cells tended to be higher in viral increased PLWH (Supplementary figure 4).

270

## 271 **Discussion**

272 Even if the replication of HIV is controlled by cART, it can still be harder for PLWH to  
273 defend against infectious diseases.<sup>16</sup> Therefore, vaccination is recommended for PLWH  
274 whose peripheral CD4<sup>+</sup> T cell counts are more than 200 cells/ $\mu$ L.<sup>17</sup> However, due to the  
275 compromised immune status, the vaccine elicited immune responses might be impaired  
276 in PLWH.<sup>18-21</sup> The efficacies of COVID-19 vaccines in PLWH were also seriously  
277 concerned, because it has been suggested that HIV-1 infection could alter the host  
278 immune responses against SARS-CoV-2.<sup>22</sup> Here, we provided evidence showing that  
279 an inactivated SARS-CoV-2 vaccine (BIBP-CorV) was immunogenic and safe in PLWH.

280 Importantly, our data demonstrated that the inactivated vaccine induced comparable  
281 antibody and T cell responses between PLWH and HC.

282 All the HIV-1 positive participants in our cohort had a CD4<sup>+</sup> T cell count of >200 cells/ $\mu$ L  
283 both at baseline and 4 weeks post vaccination. We found a statistically significant  
284 decrease in CD4<sup>+</sup> T cell count between the baseline levels and those measured  
285 following the second vaccination. The decrease of CD4<sup>+</sup> T cell count after vaccination  
286 had also been observed in PLWH inoculated with the BNT162b2 mRNA vaccine and  
287 several other vaccines usually recommended for PLWH.<sup>23,24</sup> Increases in activated T  
288 cells were found to be associated with decreases in CD4<sup>+</sup> T cell count among PLWH  
289 received vaccination,<sup>24</sup> but the reason is still not clear. Of note, both our and other  
290 studies did not identify any adverse clinical manifestation that was associated with the  
291 drop of CD4<sup>+</sup> T cell count.<sup>23,24</sup> Stable cART might be crucial to counteract the potential  
292 vaccine related deleterious effect in PLWH according to a recently published case  
293 report, which observed viral activation and CD4<sup>+</sup> T cell loss in a treatment-naïve HIV-  
294 positive patient after receiving two doses of inactivated COVID-19 vaccines.<sup>25</sup>

295 Quite surprisingly, we observed a significant drop of general viral burden in the PLWH  
296 cohort after vaccination. As percentages of activated T cells may correlate with HIV-1  
297 replication, we further evaluated the vaccine induced T cell activation by measuring the  
298 expressions of CD38 and HLA-DR on T cells. We found that the percentages of  
299 CD38<sup>+</sup>HLA-DR<sup>-</sup>CD4<sup>+</sup> T cells and CD38<sup>+</sup>HLA-DR<sup>+</sup>CD4<sup>+</sup> T cells increased significantly  
300 after vaccination. We speculate that the elimination of activated HIV-1 infected CD4<sup>+</sup> T  
301 cells by cART or autologous CTLs might account for the observed drop of HIV burden in  
302 the PLWH cohort.

303 Despite the generally comparable antibody responses between PLWH and healthy  
304 individuals, we demonstrated that HIV-1 infected vaccinees with low baseline  
305 CD4<sup>+</sup>/CD8<sup>+</sup> T cell ratio (<0.6) generated weaker antibody responses after vaccination,  
306 which was in line with previous reports showing that CD4<sup>+</sup>/CD8<sup>+</sup> T cell ratios could  
307 predict vaccine induced antibody responses in HIV-1 infected patients and HIV  
308 negative elderly.<sup>26,27</sup> Additionally, we showed that the baseline CD4<sup>+</sup>/CD8<sup>+</sup> T cell ratios  
309 did not impact the induction of specific T cell responses. Given that most vaccine  
310 induced antibody responses are CD4<sup>+</sup> T cell dependent, a potential explanation for the

311 above phenomena is that the low CD4<sup>+</sup>/CD8<sup>+</sup> T cell ratio might reflect the suboptimal  
312 support for antibody responses.

313 A major limitation of this study is the inadequate follow-up, which do not allow us to  
314 compare the persistence of antibody responses between PLWH and the healthy control.  
315 Despite of this limitation, our study demonstrates that the inactivated COVID-19 vaccine  
316 was immunogenic and safe in PLWH stable on cART.

317

### 318 **Declaration of interests**

319 The authors declare no conflict of interest.

320

### 321 **Author contributions**

322 YW and HT were involved in the study design and supervision; YF, YZ, ZH, XT  
323 GW, DC and LJ were involved in data collection; YR, WW, JW, LS, WZ and YW  
324 performed the data analysis; YW, YF and HT drafted the manuscript; WZ, LS, YW and  
325 HT revised the manuscript. HH coordinated the enrollment of PLWH. The underlying  
326 data have been verified by YF and YW.

327

### 328 **Data sharing**

329 Anonymized participant-level data will be made available 3 months following publication,  
330 upon requests directed to the corresponding author. After being approved by the  
331 sponsors (Fudan University and Hubei provincial CDC) and investigators  
332 , the data can be shared through a secure online platform. All data will be made  
333 available for a minimum of 5 years after publication.

334

### 335 **Acknowledgments**

336 We thank Dr. Lianguo Ruan from Wuhan Jinyintan Hospital for his help in PLWH cohort  
337 enrollment. We thank the volunteers who participated in this study. This work was  
338 funded by the National Natural Science Foundation of China (Grant No. 81971559,  
339 82041010).

340

### 341 **References**

342 1. Kanwugu ON, Adadi P. HIV/SARS-CoV-2 coinfection: A global perspective. *Journal of medical virology*  
343 2021; **93**(2): 726-32.

344 2. Ambrosioni J, Blanco JL, Reyes-Urueña JM, et al. Overview of SARS-CoV-2 infection in adults living with  
345 HIV. *The lancet HIV* 2021; **8**(5): e294-e305.

346 3. Mirzaei H, McFarland W, Karamouzian M, Sharifi H. COVID-19 Among People Living with HIV: A  
347 Systematic Review. *AIDS and Behavior* 2021; **25**(1): 85-92.

348 4. Cooper TJ, Woodward BL, Alom S, Harky A. Coronavirus disease 2019 (COVID-19) outcomes in  
349 HIV/AIDS patients: a systematic review. *HIV medicine* 2020; **21**(9): 567-77.

350 5. Spinelli MA, Lynch KL, Yun C, et al. SARS-CoV-2 seroprevalence, and IgG concentration and pseudovirus  
351 neutralising antibody titres after infection, compared by HIV status: a matched case-control  
352 observational study. *The lancet HIV* 2021; **8**(6): e334-e41.

353 6. Callaway E, Mallapaty S. Novavax offers first evidence that COVID vaccines protect people against  
354 variants. *Nature* 2021; **590**(7844): 17.

355 7. Woldemeskel BA, Karaba AH, Garliss CC, et al. The BNT162b2 mRNA Vaccine Elicits Robust Humoral  
356 and Cellular Immune Responses in People Living with HIV. *Clinical infectious diseases : an official*  
357 *publication of the Infectious Diseases Society of America* 2021.

358 8. Ruddy JA, Boyarsky BJ, Bailey JR, et al. Safety and antibody response to two-dose SARS-CoV-2  
359 messenger RNA vaccination in persons with HIV. *AIDS (London, England)* 2021.

360 9. Frater J, Ewer KJ, Ogbe A, et al. Safety and immunogenicity of the ChAdOx1 nCoV-19 (AZD1222)  
361 vaccine against SARS-CoV-2 in HIV infection: a single-arm substudy of a phase 2/3 clinical trial. *The*  
362 *lancet HIV* 2021; **8**(8): e474-e85.

363 10. Spinelli MA. SARS-CoV-2 vaccination in people with HIV. *The lancet HIV* 2021; **8**(8): e455-e6.

364 11. Lau EHY, Tsang OTY, Hui DSC, et al. Neutralizing antibody titres in SARS-CoV-2 infections. *Nat*  
365 *Commun* 2021; **12**(1): 63.

366 12. Wajnberg A, Amanat F, Firpo A, et al. Robust neutralizing antibodies to SARS-CoV-2 infection persist  
367 for months. *Science (New York, NY)* 2020; **370**(6521): 1227-30.

368 13. Onlamoon N, Unpol P, Boonchan M, et al. Immune activation and viral replication after vaccination  
369 with an influenza A H1N1 2009 vaccine in HIV-infected children receiving antiretroviral therapy. *Disease*  
370 *markers* 2013; **35**(4): 221-7.

371 14. Hu H, Eller MA, Zafar S, et al. Preferential infection of human Ad5-specific CD4 T cells by HIV in Ad5  
372 naturally exposed and recombinant Ad5-HIV vaccinated individuals. 2014; **111**(37): 13439-44.

373 15. Immunization with Both T Cell-Dependent and T Cell-Independent Vaccines Augments HIV Viral Load  
374 Secondarily to Stimulation of Tumor Necrosis Factor  $\alpha$ . 1998; **14**(9): 727-34.

375 16. Crum-Cianflone NF, Wallace MR. Vaccination in HIV-infected adults. *AIDS patient care and STDs* 2014;  
376 **28**(8): 397-410.

377 17. Frésard A, Gagneux-Brunon A, Lucht F, Botelho-Nevers E, Launay O. Immunization of HIV-infected  
378 adult patients - French recommendations. *Human vaccines & immunotherapeutics* 2016; **12**(11): 2729-  
379 41.

380 18. Beck CR, McKenzie BC, Hashim AB, et al. Influenza vaccination for immunocompromised patients:  
381 systematic review and meta-analysis from a public health policy perspective. *PloS one* 2011; **6**(12):  
382 e29249.

383 19. Tebas P, Frank I, Lewis M, et al. Poor immunogenicity of the H1N1 2009 vaccine in well controlled  
384 HIV-infected individuals. *AIDS (London, England)* 2010; **24**(14): 2187-92.

385 20. George VK, Pallikkuth S, Parmigiani A, et al. HIV infection Worsens Age-Associated Defects in  
386 Antibody Responses to Influenza Vaccine. *The Journal of infectious diseases* 2015; **211**(12): 1959-68.

387 21. Mansoor N, Scriba TJ, de Kock M, et al. HIV-1 Infection in Infants Severely Impairs the Immune  
388 Response Induced by Bacille Calmette-Guérin Vaccine. *The Journal of infectious diseases* 2009; **199**(7):  
389 982-90.

390 22. Karim F, Gazy I, Cele S, et al. HIV infection alters SARS-CoV-2 responsive immune parameters but not  
391 clinical outcomes in COVID-19 disease. 2020: 2020.11.23.20236828.  
392 23. Levy I, Wieder-Finesod A, Litchevsky V, et al. Immunogenicity and safety of the BNT162b2 mRNA  
393 Covid-19 vaccine in people living with HIV-1. *Clinical microbiology and infection : the official publication*  
394 *of the European Society of Clinical Microbiology and Infectious Diseases* 2021.  
395 24. Castro P, Plana M, González R, et al. Influence of a vaccination schedule on viral load rebound and  
396 immune responses in successfully treated HIV-infected patients. *AIDS research and human retroviruses*  
397 2009; **25**(12): 1249-59.  
398 25. Gong C, Song X, Li X, Lu L, Li T. Immunological Changes after COVID-19 Vaccination in an HIV-Positive  
399 Patient. *International journal of infectious diseases : IJID : official publication of the International Society*  
400 *for Infectious Diseases* 2021.  
401 26. Avelino-Silva VI, Miyaji KT, Hunt PW, et al. CD4/CD8 Ratio and KT Ratio Predict Yellow Fever Vaccine  
402 Immunogenicity in HIV-Infected Patients. *PLoS neglected tropical diseases* 2016; **10**(12): e0005219.  
403 27. Strindhall J, Ernerudh J, Mörner A, et al. Humoral response to influenza vaccination in relation to pre-  
404 vaccination antibody titres, vaccination history, cytomegalovirus serostatus and CD4/CD8 ratio.  
405 *Infectious diseases (London, England)* 2016; **48**(6): 436-42.

406  
407  
408  
409  
410  
411  
412  
413  
414  
415  
416  
417  
418  
419  
420  
421  
422  
423  
424  
425  
426  
427

## 428 **Figure legends**

429

430 **Figure 1 The inactivated SARS-CoV-2 vaccine elicited comparable RBD binding**  
431 **antibody and neutralizing antibody responses in PLWH with those in the control**

432 All participants in our study received two doses of the inactivated SARS-CoV-2 vaccine  
433 (BIBP-CorV) produced by Beijing Institute of Biological Products at an interval of 4  
434 weeks. Peripheral blood samples were collected at baseline, 4 weeks post the 1<sup>st</sup> dose  
435 and 4 weeks post the 2<sup>nd</sup> dose. RBD binding antibody (**A, B, C**) and neutralizing  
436 antibody (**D, E, F**) responses were measured and compared between PLWH (n=28) and  
437 healthy individuals (n=42). Statistical analyses were performed by the method of non-  
438 parametric t test. \*\*\*\*, P<0.0001.

439

#### 440 **Figure 2 Comparisons of S protein specific T cell responses between PLWH and** 441 **healthy individuals**

442 S protein specific IFN- $\gamma$  secreting T cells were measured using flowcytometry. The  
443 inactivated vaccine elicited similar levels of S protein specific CD4<sup>+</sup> (**A**) and CD8<sup>+</sup> T cell  
444 responses (**B**) in PLWH and HC. Statistical analyses were performed by the method of  
445 non-parametric t test. \*\*\*\*, P<0.0001.

446

#### 447 **Figure 3 Baseline CD4<sup>+</sup>/CD8<sup>+</sup> T cell ratios were associated with specific antibody** 448 **responses after vaccination in PLWH**

449 HIV-1 infected participants were stratified into 3 subgroups according to their baseline  
450 CD4<sup>+</sup>/CD8<sup>+</sup> T cell ratios (<0.6, 0.6~1.0 and  $\geq$ 1.0). RBD binding antibody (**A**),  
451 neutralizing antibody (**B**) and S2 binding antibody (**C**) responses were compared among  
452 the three subgroups. Statistical analysis for (**A**) was performed by the method of non-  
453 parametric t test and statistical analyses for (**B**) and (**C**) were done by the method of  
454 parametric t test. \*, P<0.05; \*\*, P<0.01; \*\*\*, P<0.001.

455

#### 456 **Figure 4 The patterns of vaccine induced T cell activation were different between** 457 **PLWH and HC**

458 The activation of T cells was assessed through detecting the expressions of CD38 and  
459 HLA-DR on T cells. (**A, B, C**) The percentages of CD38<sup>-</sup>HLA-DR<sup>+</sup>, CD38<sup>+</sup>HLA-DR<sup>-</sup> and  
460 CD38<sup>+</sup>HLA-DR<sup>+</sup> among CD4<sup>+</sup> T cells. (**D, E, F**) The percentages of CD38<sup>-</sup>HLA-DR<sup>+</sup>,  
461 CD38<sup>+</sup>HLA-DR<sup>-</sup> and CD38<sup>+</sup>HLA-DR<sup>+</sup> among CD8<sup>+</sup> T cells. Statistical analyses were  
462 performed by the method of two-way ANOVA. \*\*, P<0.01; \*\*\*\*, P<0.0001.

463  
464  
465  
466  
467  
468  
469  
470  
471  
472  
473  
474  
475  
476  
477  
478  
479  
480  
481  
482  
483  
484  
485  
486  
487

**Table 1** Demographical characteristics of enrolled vaccinees

|                            | <b>PLWH</b> | <b>HC</b>   | <b>P value</b> |
|----------------------------|-------------|-------------|----------------|
| <b>Gender</b>              |             |             |                |
| <b>Man (n)</b>             | 29          | 16          | 0.3228         |
| <b>Woman (n)</b>           | 13          | 12          |                |
| <b>Age (Year, mean±SD)</b> | 42.74±10.17 | 37.79±8.804 | 0.0392         |
| <b>BMI (Mean±SD)</b>       | 23.97±6.967 | 24.07±3.8   | 0.2867         |

Note: PLWH, people living with HIV; HC, healthy control



**Table 2** Peripheral T cell counts and plasma viral loads of PLWH

|                                                  | <b>Baseline</b>     | <b>4 weeks post the 2<sup>nd</sup> dose</b> | <b>P value</b>           |
|--------------------------------------------------|---------------------|---------------------------------------------|--------------------------|
| <b>T cell count</b>                              |                     |                                             |                          |
| (Mean ± SD cells/μL, n)                          |                     |                                             |                          |
| CD3 <sup>+</sup> T                               | 1550 ± 502, 28      | 1121 ± 336, 28                              | Paired t-test, <0.0001   |
| CD4 <sup>+</sup> T                               | 659 ± 222, 28       | 477 ± 151, 28                               | Paired t-test, <0.0001   |
| CD8 <sup>+</sup> T                               | 813 ± 361, 28       | 586 ± 240, 28                               | Paired t-test, <0.0001   |
| <b>CD4<sup>+</sup> T/CD8<sup>+</sup> T ratio</b> |                     |                                             |                          |
| (Median, 25%-75% percentile, n)                  | 0.86, 0.60-1.05, 28 | 0.82, 0.62-1.25, 28                         | Paired rank test, 0.5194 |
| <b>Plasma viral load</b>                         |                     |                                             |                          |
| >20 copies/mL (n)                                | 12                  | 4                                           |                          |
| <20 copies/mL (n)                                | 8                   | 4                                           | Chi square test, 0.0192  |
| Undetectable (n)                                 | 22                  | 34                                          |                          |

**Figure 1** Comparisons of RBD binding antibody and neutralizing antibody responses between PLWH and healthy individuals

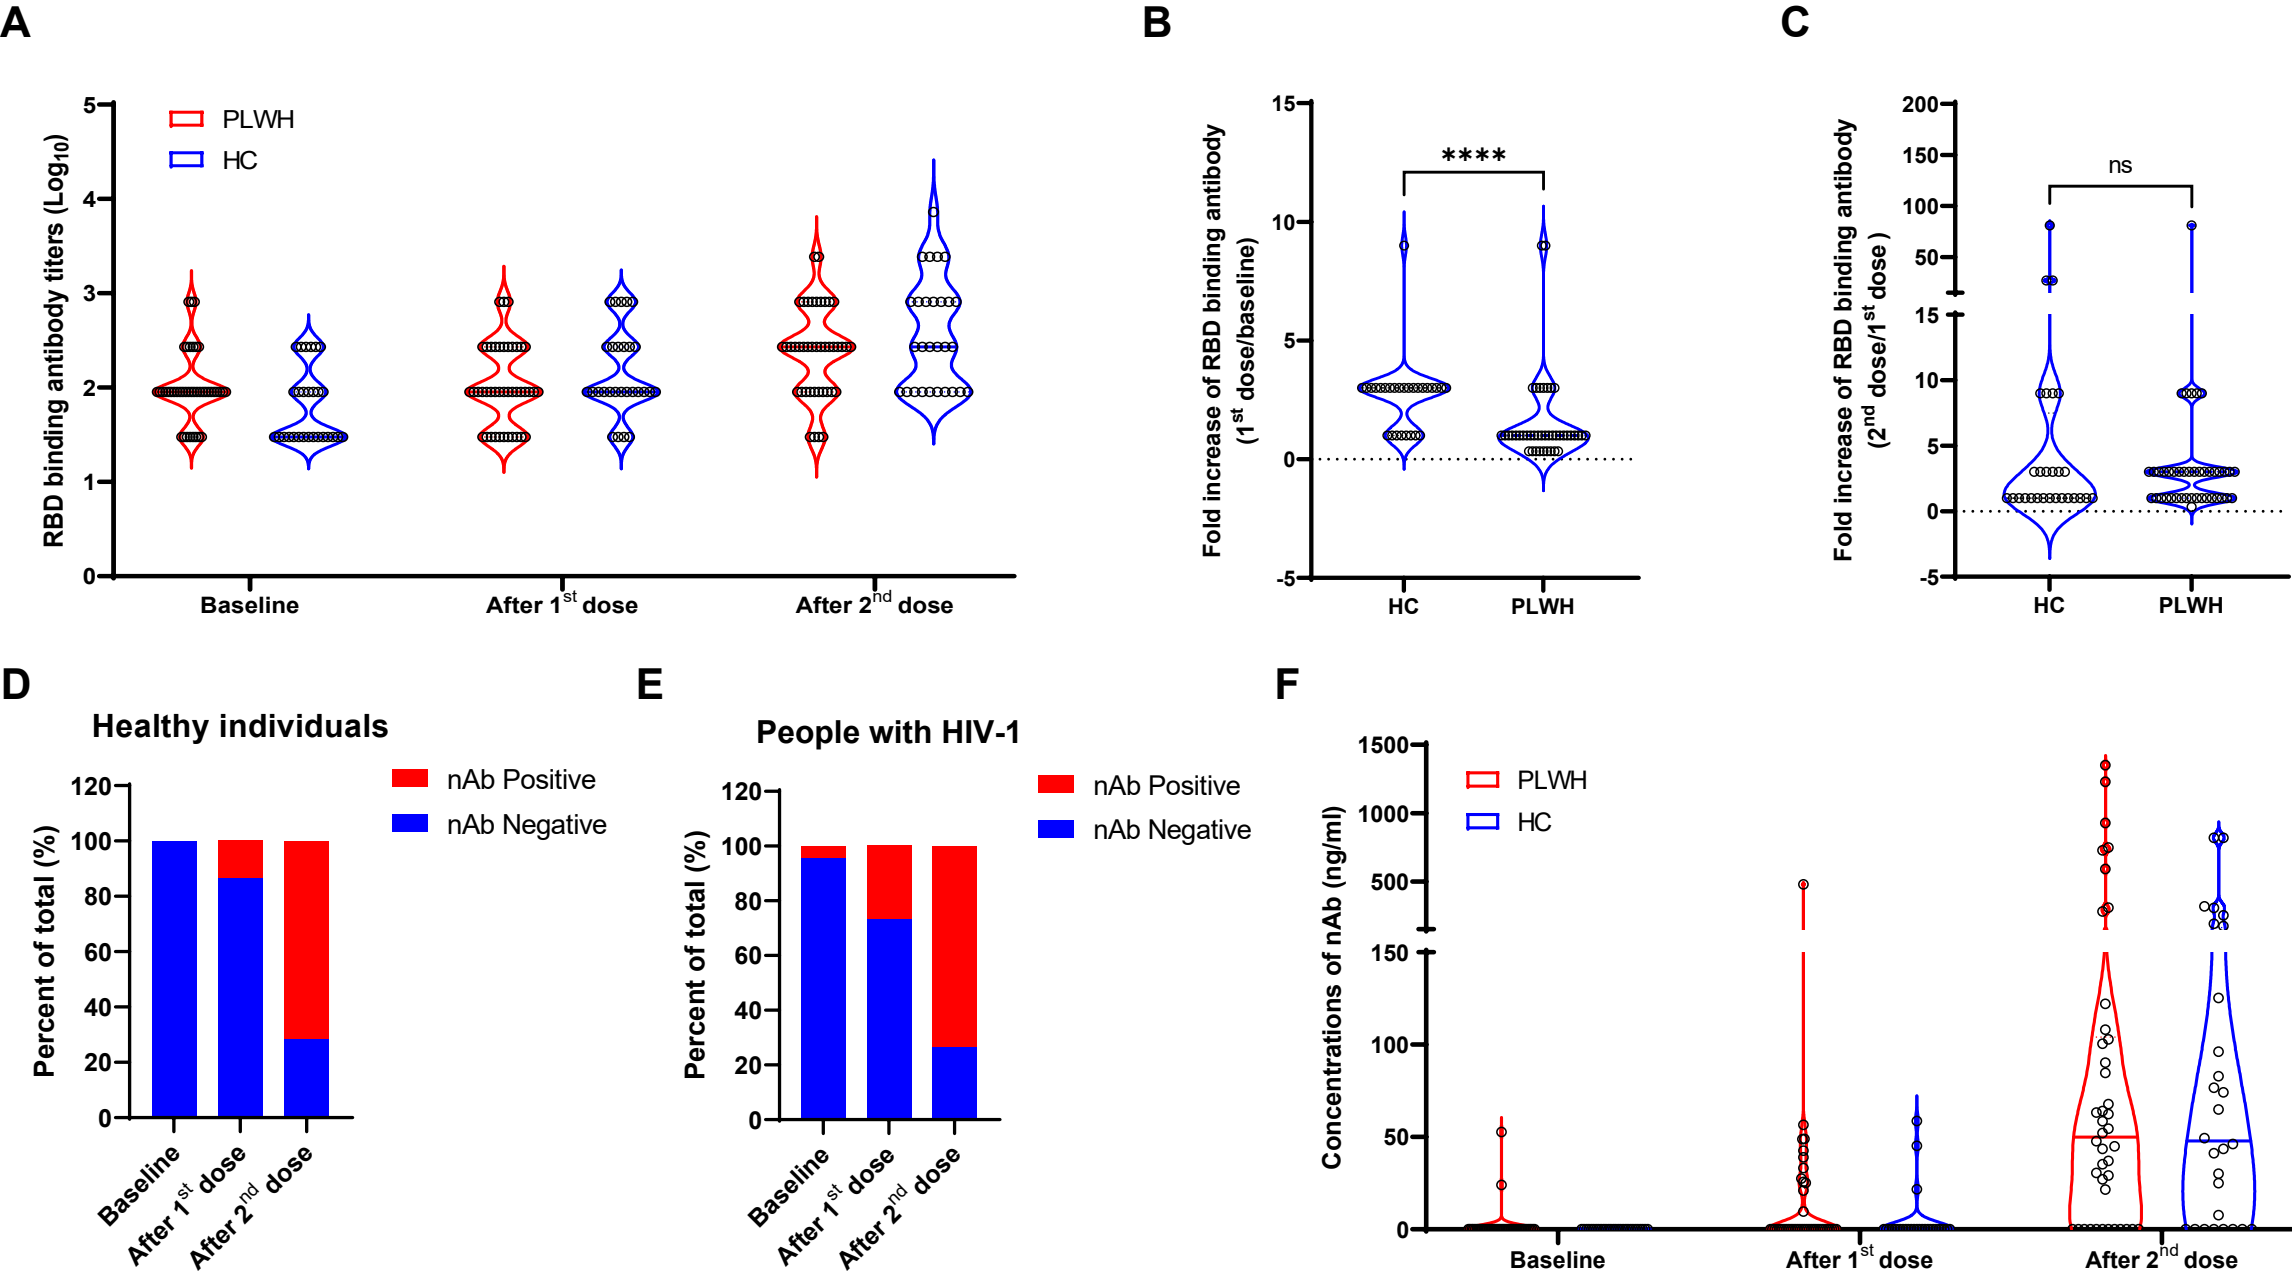

**Figure 2** Comparisons of S specific T cell responses between PLWH and healthy individuals

**A**

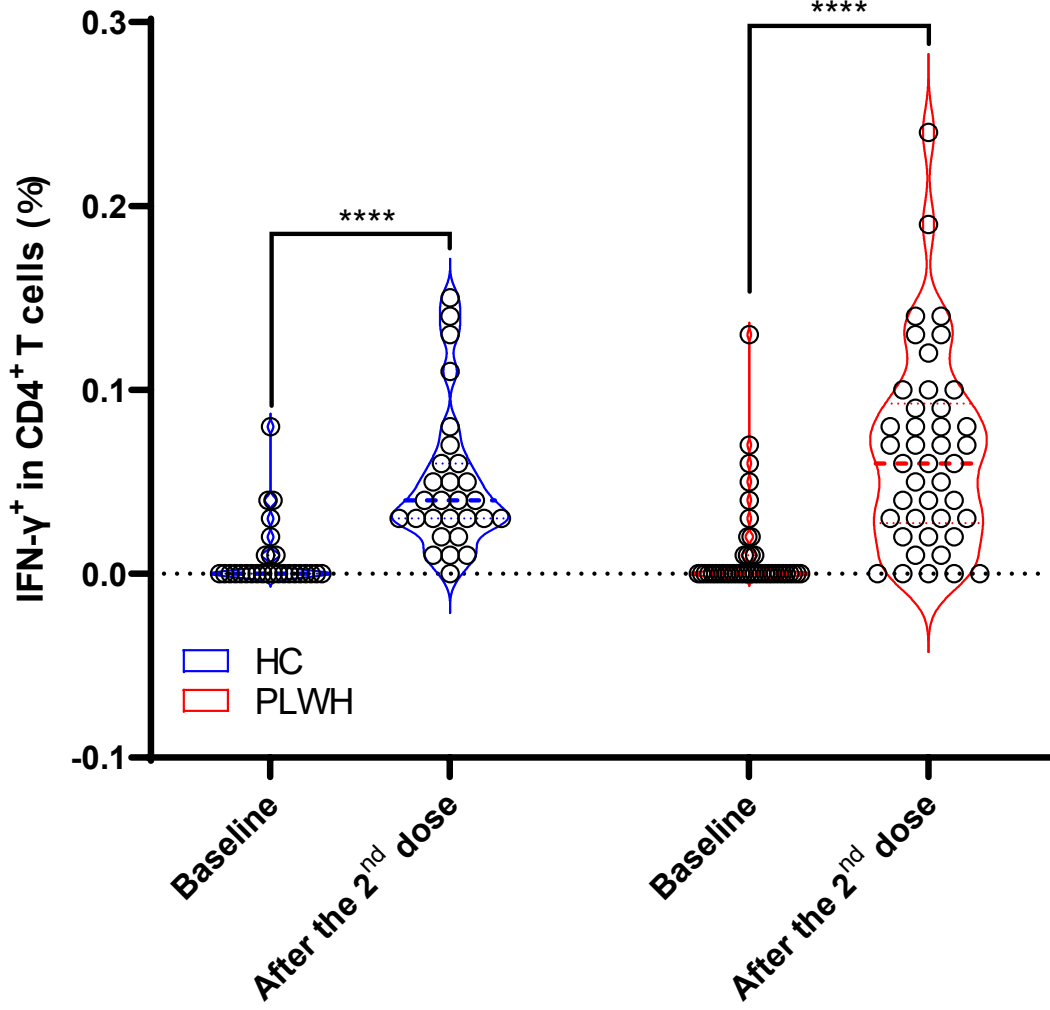

**B**

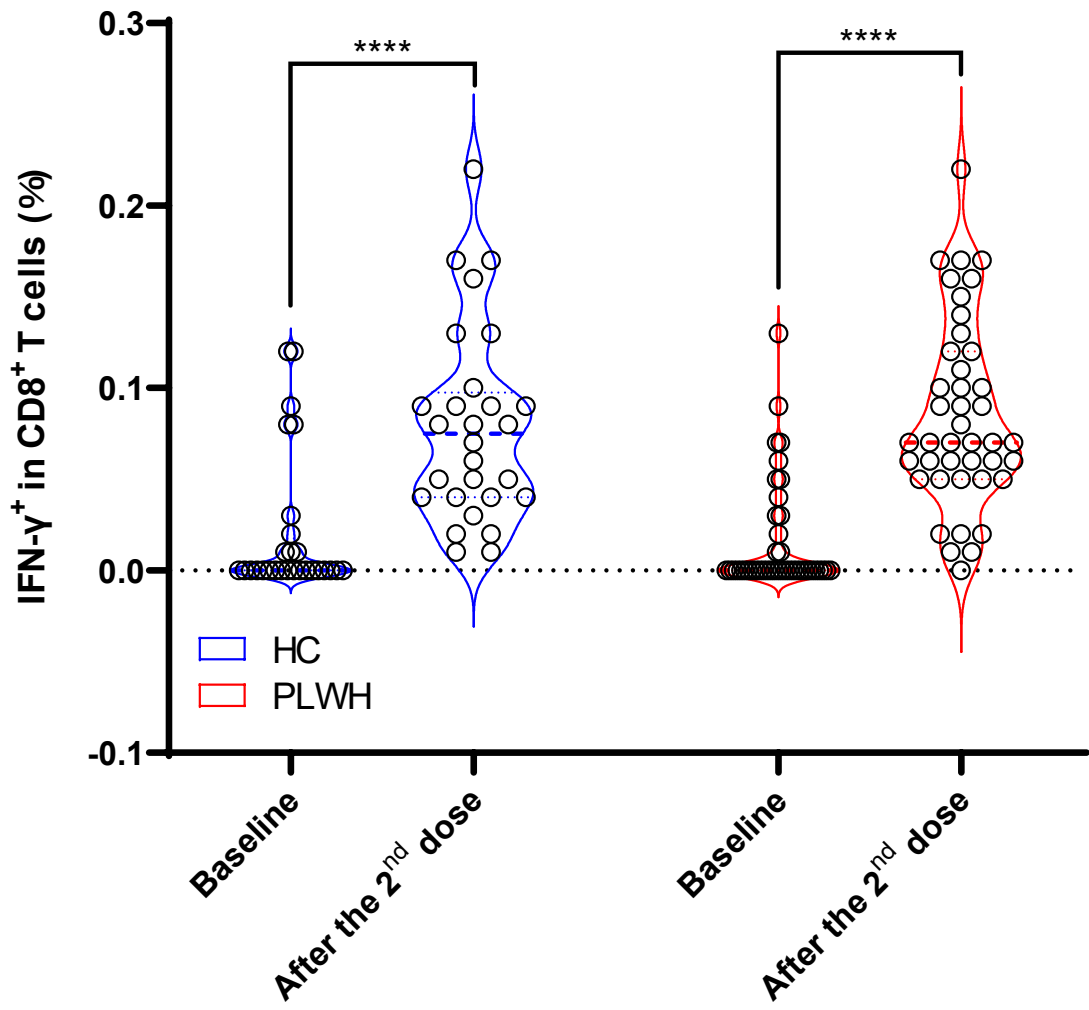

**Figure 3** Baseline CD4/CD8 ratios were associated with the antibody responses after two doses of vaccination in PLWH

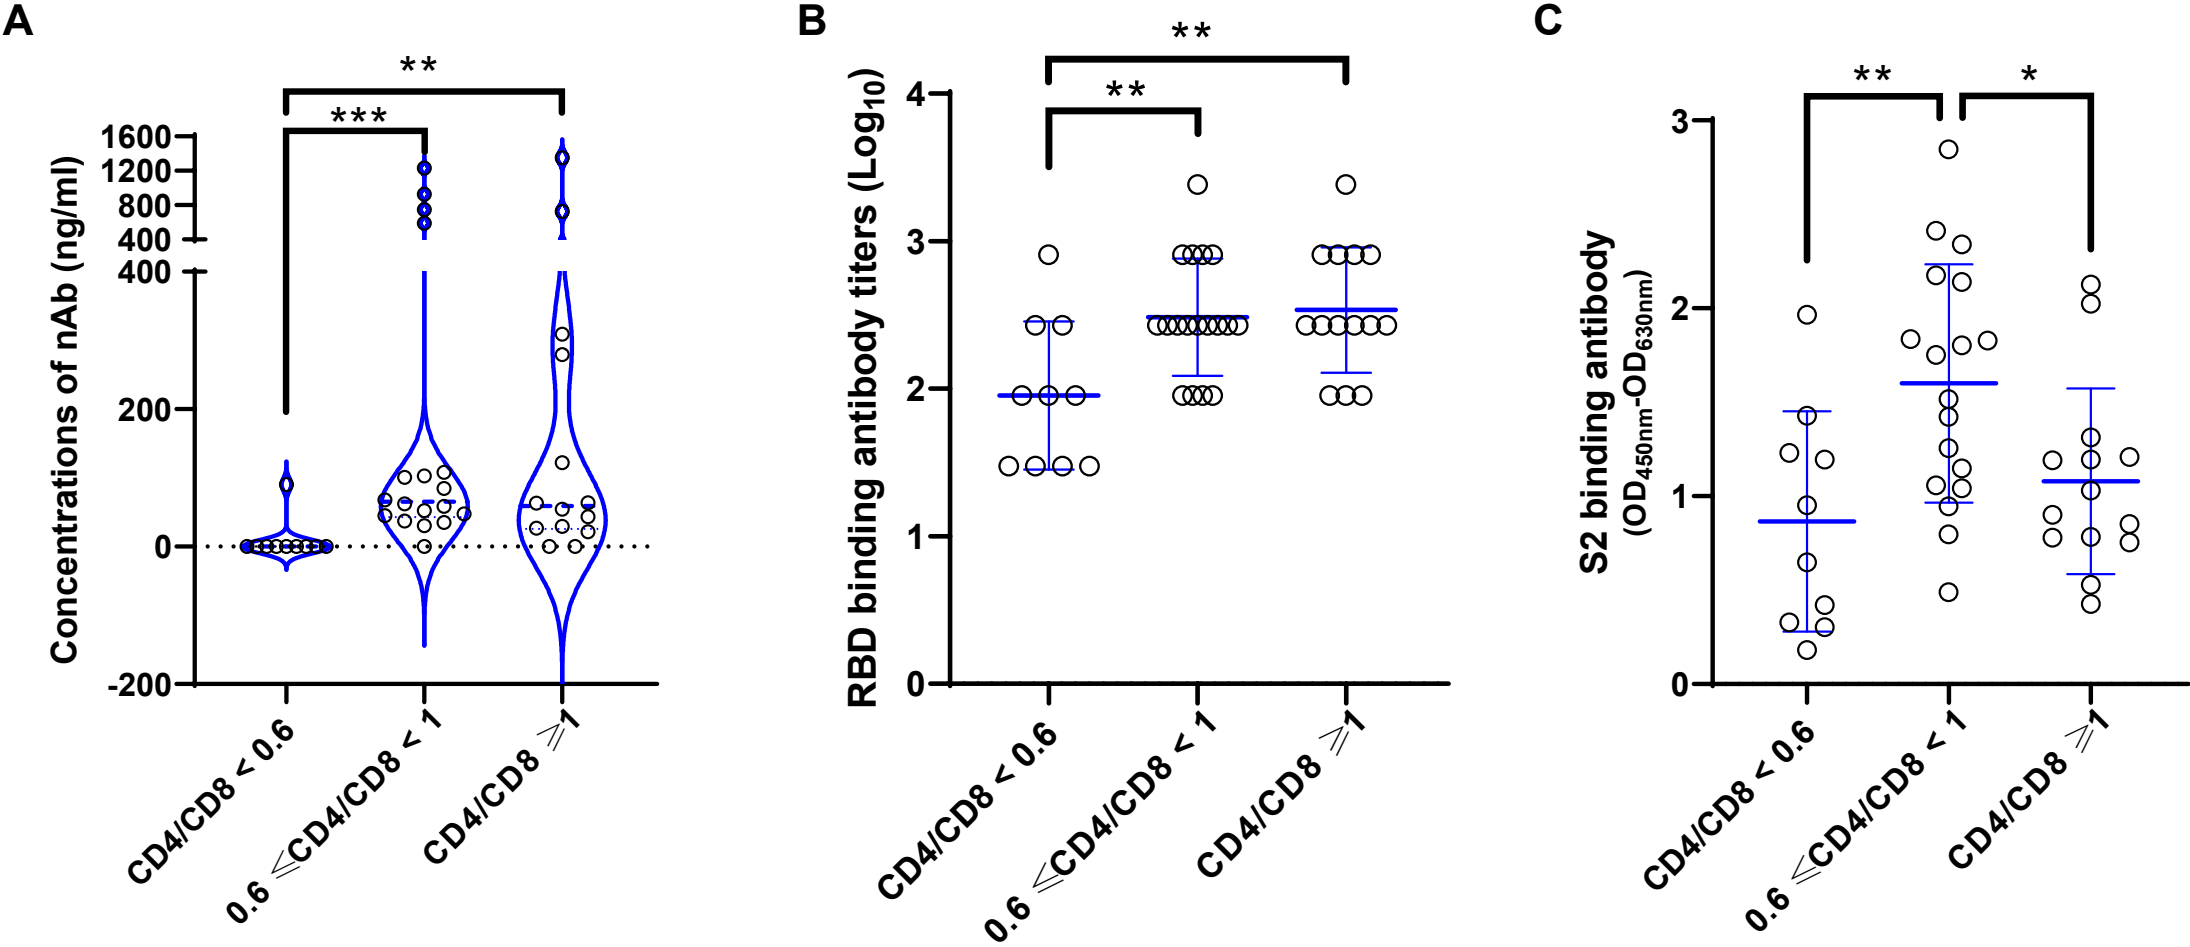

**Figure 4** The patterns of vaccine induced T cell activation were different between PLWH and HC

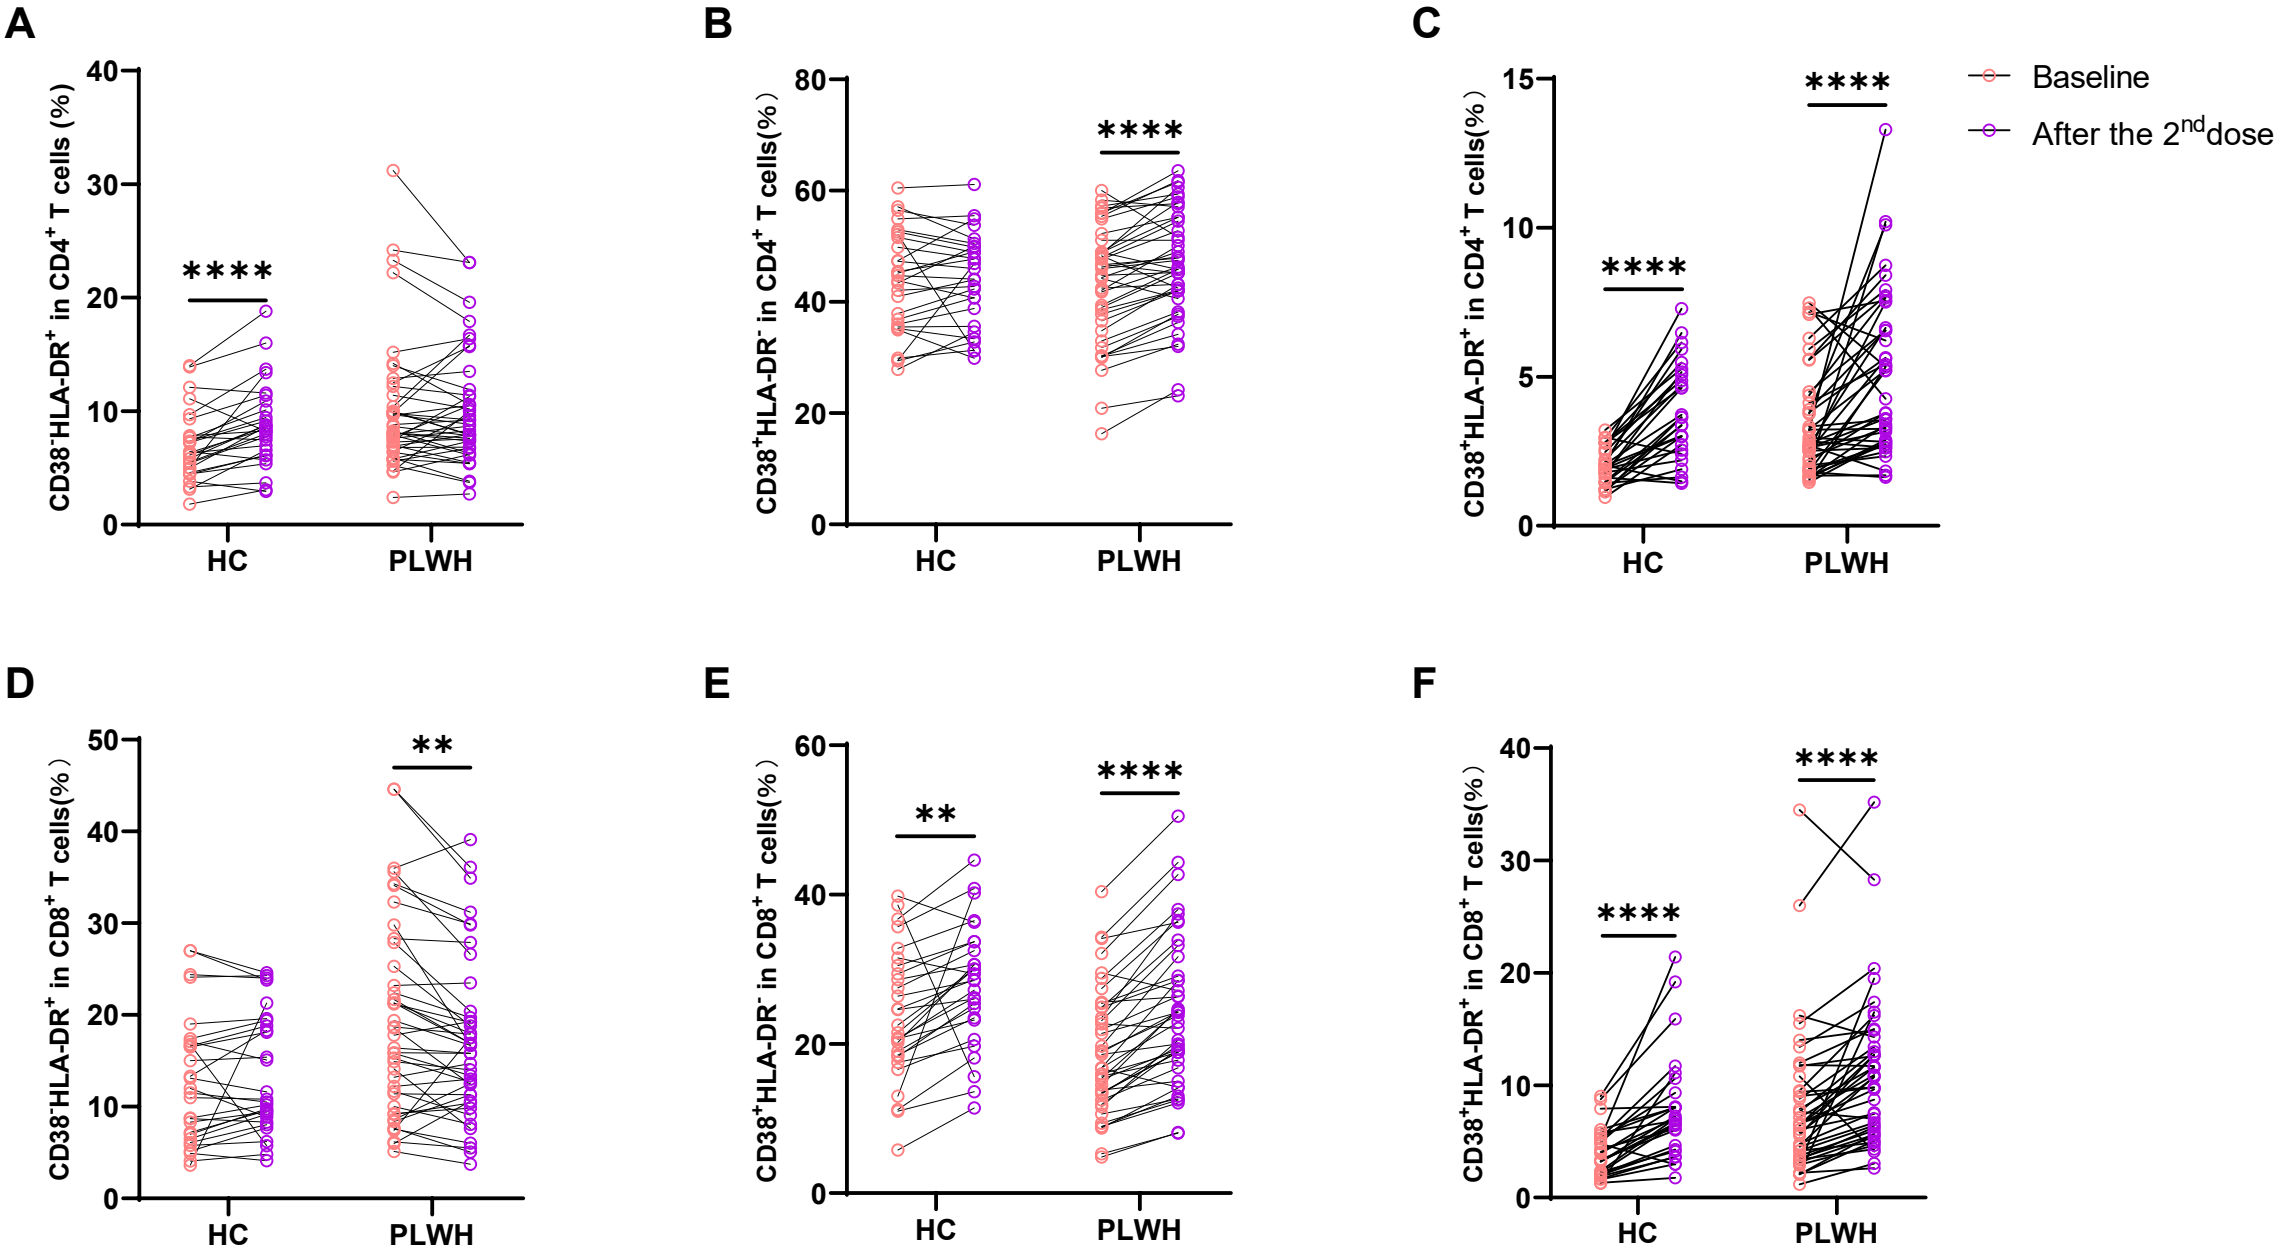

Source: https://medrxiv.org/content/medrxiv/early/2021/10/15/2021.09.14.21263556.full.pdf
