# Supplementary material for: Immunogenicity and safety of an inactivated SARS-CoV-2 vaccine in people living with HIV-1
Source: bioRxiv or medRxiv preprint supplement (doi:10.1101/2021.09.14.21263556), 2021-10-15

## Supplementary materials

| Contents                                                                                                                                                                           | Page numbers |
|------------------------------------------------------------------------------------------------------------------------------------------------------------------------------------|--------------|
| Supplementary figure legends                                                                                                                                                       | 1            |
| Supplementary figure 1: The gating strategy of flow cytometry                                                                                                                      | 2            |
| Supplementary figure 2: Comparisons of S2 binding antibody responses between PLWH and healthy individuals                                                                          | 3            |
| Supplementary figure 3: Baseline CD4/CD8 ratios were not significantly associated with the vaccine elicited T cells responses in PLWH                                              | 4            |
| Supplementary figure 4: The vaccine induced activation of CD4+ T cells in individuals with elevated viral loads tended to be higher than those in viral load decreased individuals | 5            |

## Supplementary figure legends

### Supplementary Figure 1 The gating strategy of flow cytometry

### Supplementary Figure 2 Comparisons of S2 binding antibody responses between PLWH and healthy individuals

The SARS-CoV-2 S2 specific binding antibodies were detected using an in-house ELISA method. The inactivated COVID-19 vaccine elicited similar levels of S2 binding antibodies in PLWH and HC. Statistical analyses were performed by the method of non-parametric t test. \*\*\*\*,  $P < 0.0001$ .

### Supplementary Figure 3 Baseline CD4/CD8 ratios were not significantly associated with the vaccine elicited T cells responses in PLWH

HIV-1 infected participants were stratified into 3 subgroups according to their baseline CD4<sup>+</sup>/CD8<sup>+</sup> T cell ratios (<0.6, 0.6~1.0 and ≥1.0). S protein specific IFN- $\gamma$  secreting CD4<sup>+</sup> (A) and CD8<sup>+</sup> T cells (B) were compared among the three subgroups. Statistical analyses were performed by the method one-way ANOVA.

### Supplementary Figure 4 The vaccine induced activation of CD4<sup>+</sup> T cells in individuals with elevated viral loads tended to be higher than those in viral load decreased individuals

Among the PLWH cohort, 14 participants were found with decreased HIV-1 viral loads and 5 participants showed increased HIV-1 viral loads after two doses of vaccination. The activation levels of CD4<sup>+</sup> T cells were compared between these two subgroups. (A) The fold changes (After the 2<sup>nd</sup> vaccination/baseline) of CD38<sup>+</sup>HLA-DR<sup>+</sup>CD4<sup>+</sup> T cell percentages. (B) The fold changes of CD38<sup>+</sup>HLA-DR<sup>+</sup>CD4<sup>+</sup> T cell percentages. (C) The fold changes of CD38<sup>+</sup>HLA-DR<sup>+</sup>CD4<sup>+</sup> T cell percentages.

Supplementary Figure 1 The gating strategy of flow cytometry

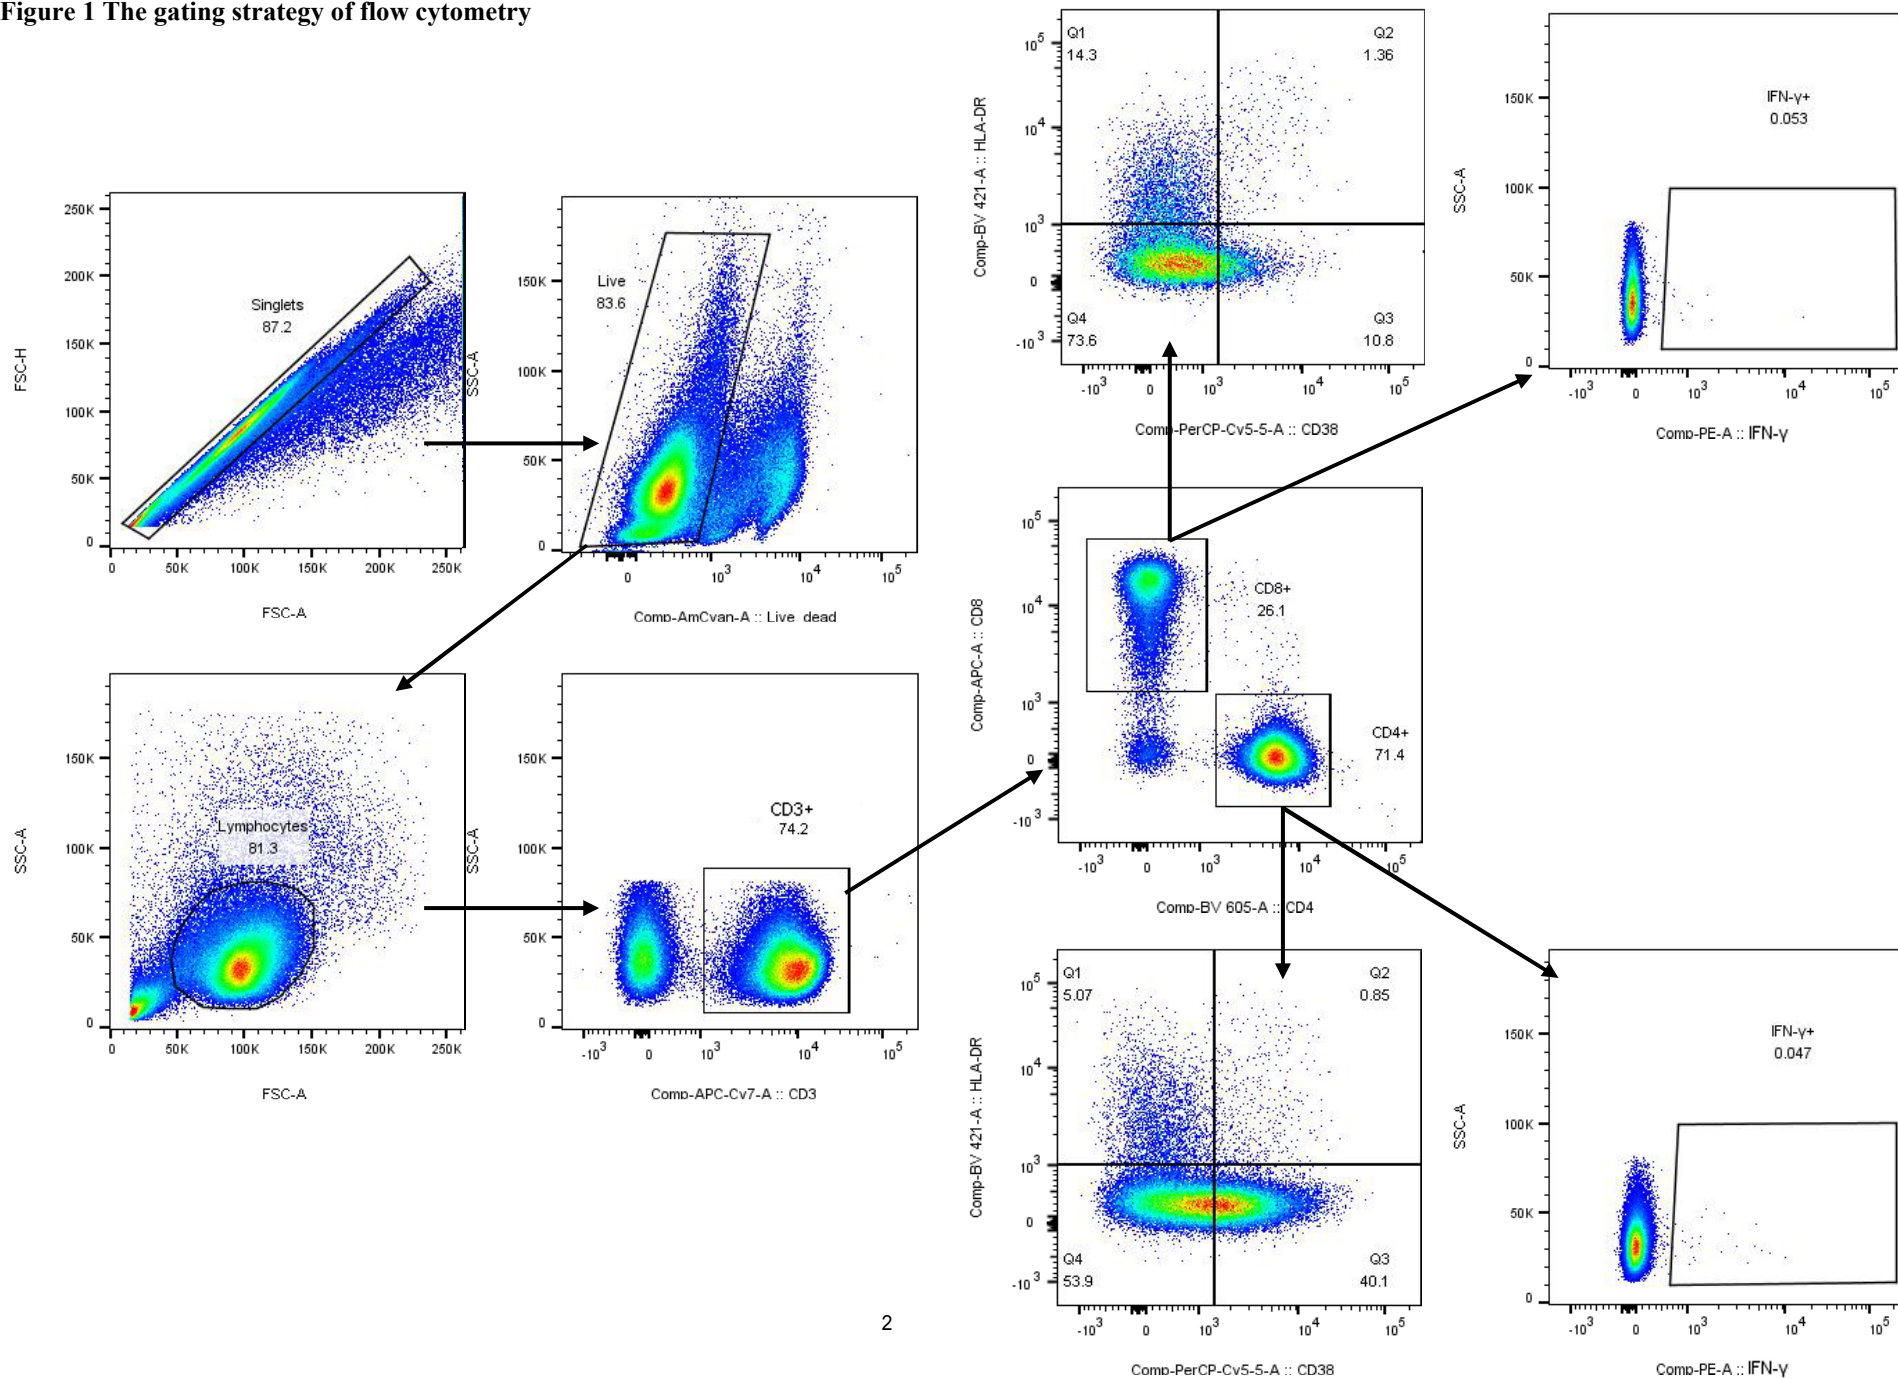

Supplementary Figure 2 Comparisons of S2 binding antibody responses between PLWH and healthy individuals

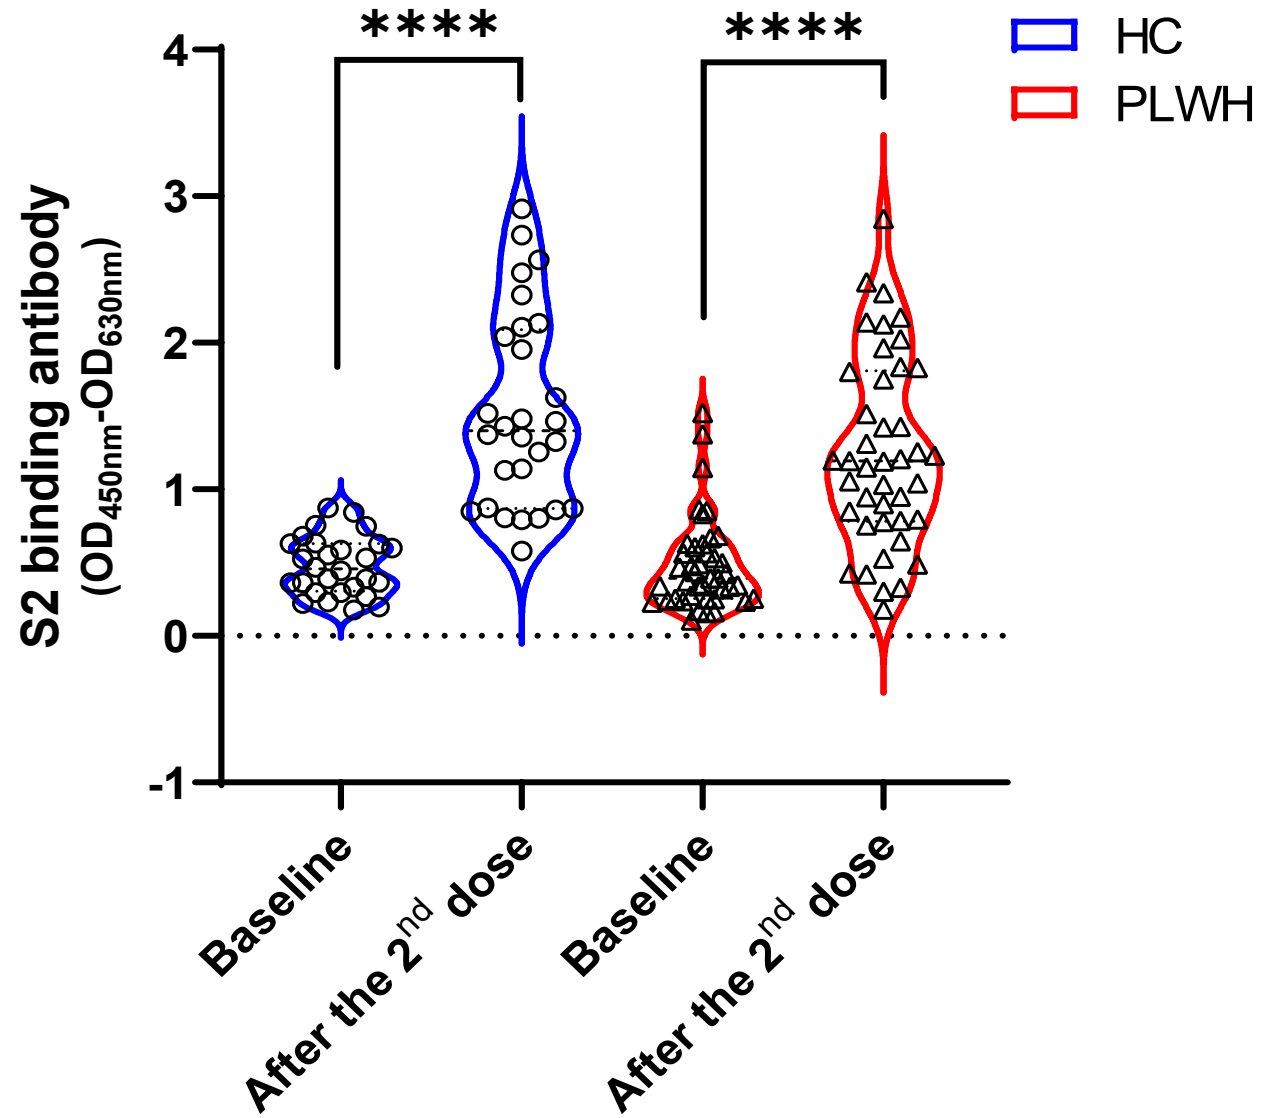

Supplementary Figure 3 Baseline CD4/CD8 ratios were not significantly associated with the vaccine elicited T cells responses in PLWH

A

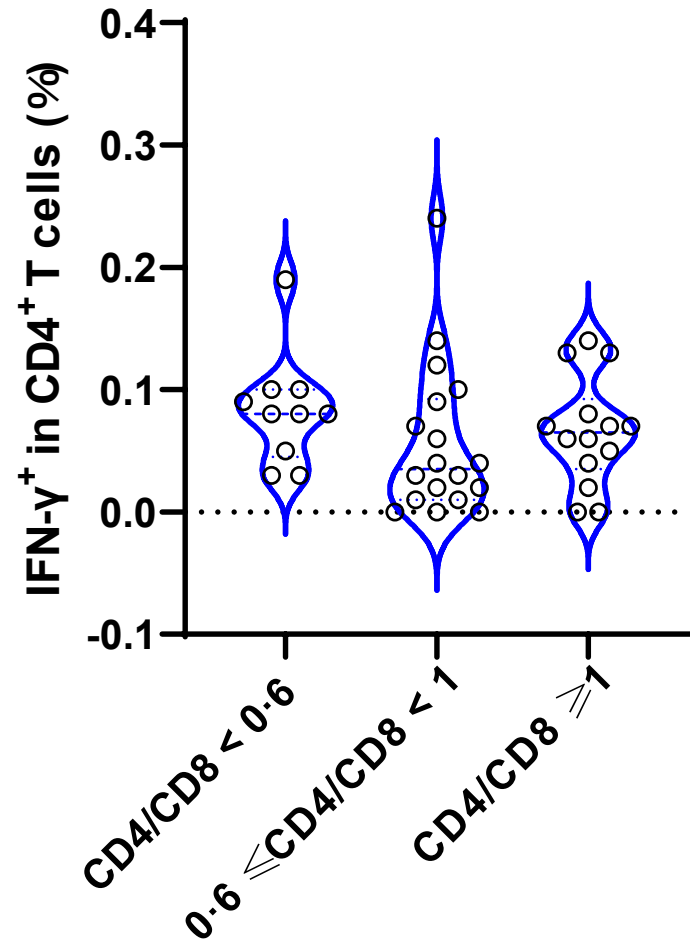

B

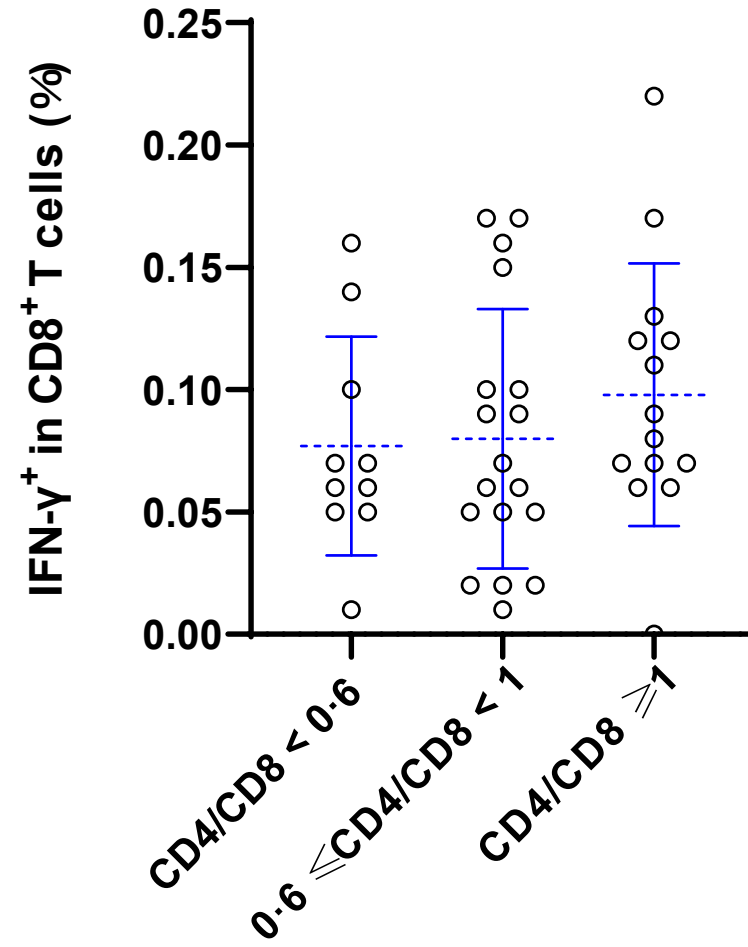

**A**

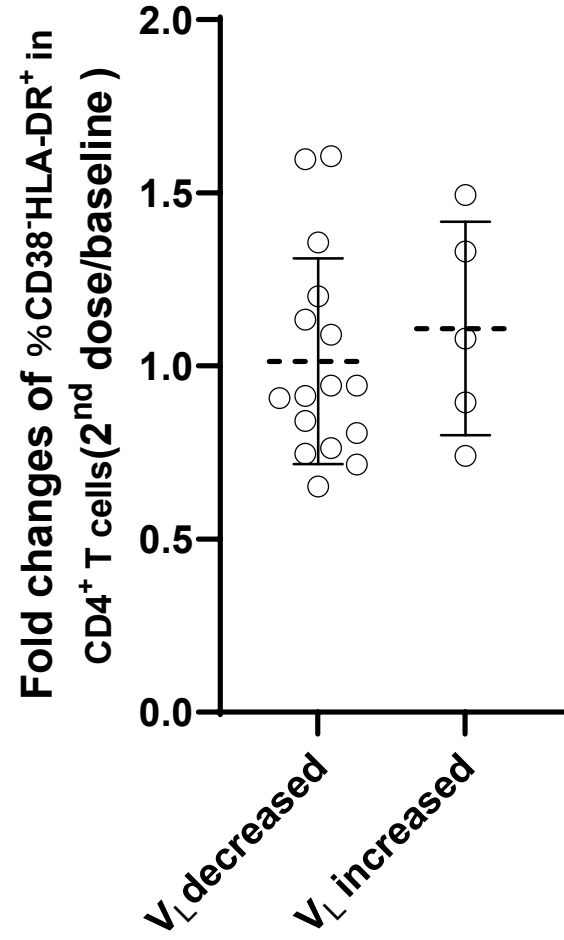

**B**

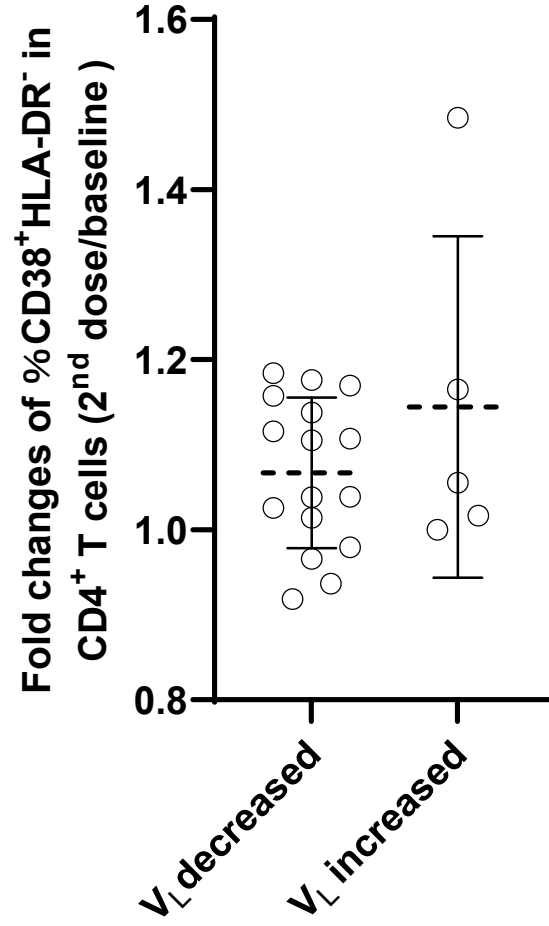

**C**

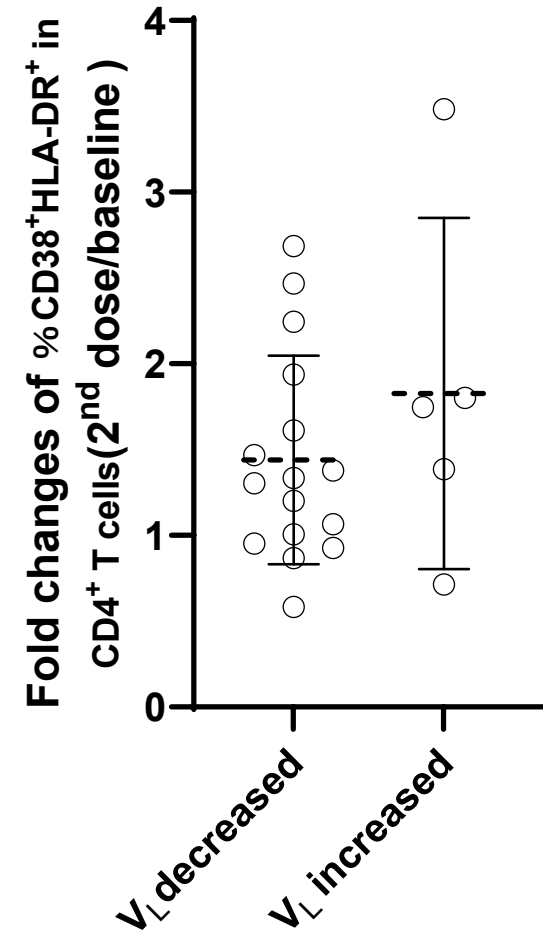

Supplement: Supplementary file [file media-1.pdf]
